# Supplementary material for: Oral Health Status of Children and Adolescents Living with HIV Undergoing Antiretroviral Therapy: A Systematic Review and Meta-Analysis
Source: MDPI journal article supplement (doi:10.3390/ijerph191912864), 2022-10-08
Supplement: s1 [file s1]

**Table S1.** GRADE summary of findings table for the primary outcome (caries prevention and arrest) and secondary outcome.

| Outcome                                                                           | Comparison | No. of studies | No. of HIV-infected and healthy controls | Results                                                                           | Risk of bias <sup>a</sup> | Inconsistency <sup>b</sup>       |                                               | Indirectness <sup>c</sup> | Imprecision <sup>d</sup> | Publication bias <sup>e</sup> | Quality of evidence (GRADE) |
|-----------------------------------------------------------------------------------|------------|----------------|------------------------------------------|-----------------------------------------------------------------------------------|---------------------------|----------------------------------|-----------------------------------------------|---------------------------|--------------------------|-------------------------------|-----------------------------|
|                                                                                   |            |                |                                          |                                                                                   |                           | <i>I</i> <sup>2</sup> statistics | Heterogeneity $\chi^2$ test ( <i>p</i> value) |                           |                          |                               |                             |
| HIV-infected individuals under antiretroviral medications versus healthy controls |            |                |                                          |                                                                                   |                           |                                  |                                               |                           |                          |                               |                             |
| Dental caries experience                                                          | Prevalence | 2              | 515 & 513                                | Inconsistent results                                                              | Not serious               | 86.7%*                           | 0.006**                                       | Not serious               | Not serious              | N/A                           | ⊕⊕⊕⊕ very low               |
|                                                                                   |            | 2              | 125 & 125                                | Significantly higher among HIV-infected children under antiretroviral medications | Not serious               | 69.7%*                           | 0.069                                         | Not serious               | Serious                  | N/A                           |                             |
| Periodontal condition                                                             | Prevalence |                |                                          |                                                                                   |                           |                                  |                                               |                           |                          |                               | ⊕⊕⊕⊕ very low               |
| Angular cheilitis                                                                 | Prevalence | 2              | 112 & 112                                | No significant difference                                                         | Not serious               | 0.0%                             | 0.667                                         | Not serious               | Serious                  | N/A                           | ⊕⊕⊕⊕ low                    |
|                                                                                   |            |                |                                          |                                                                                   |                           |                                  |                                               |                           | ↓                        | --                            |                             |
| Linear gingival erythema                                                          | Prevalence | 2              | 112 & 112                                | No significant difference                                                         | Not serious               | 0.0%                             | 1.00                                          | Not serious               | Serious                  | N/A                           | ⊕⊕⊕⊕ low                    |
|                                                                                   |            | 3              | 142 & 142                                | Significantly higher among HIV-infected children under antiretroviral medications | Not serious               | 0.0%                             | 0.784                                         | Not serious               | Serious                  | N/A                           |                             |
| Recurrent oral ulceration                                                         | Prevalence |                |                                          |                                                                                   |                           |                                  |                                               |                           |                          |                               | ⊕⊕⊕⊕ low                    |
|                                                                                   |            |                |                                          |                                                                                   |                           |                                  |                                               |                           | ↓                        | --                            |                             |
| Oral candidiasis                                                                  | Prevalence | 5              | 216 & 262                                | Significantly higher among HIV-infected children under antiretroviral medications | Not serious               | 0.0%                             | 0.944                                         | Not serious               | Serious                  | N/A                           |                             |
|                                                                                   |            |                |                                          |                                                                                   |                           |                                  |                                               |                           | ↓                        | --                            | ⊕⊕⊕⊕ low                    |
| Oral hairy leukoplakia                                                            | Prevalence | 2              | 112 & 105                                | No significant difference                                                         | Not serious               | 0.0%                             | 1.00                                          | Not serious               | Serious                  | N/A                           | ⊕⊕⊕⊕ low                    |
|                                                                                   |            |                |                                          |                                                                                   |                           |                                  |                                               |                           | ↓                        | --                            |                             |
| Hyperpigmentation                                                                 | Prevalence | 3              | 207 & 200                                | Significantly higher among                                                        | Not serious               | 0.0%                             | 0.784                                         | Not serious               | Serious                  | N/A                           | ⊕⊕⊕⊕ low                    |

|                                                                                |    |    |    |    |   |    |
|--------------------------------------------------------------------------------|----|----|----|----|---|----|
| HIV-<br>infected<br>children<br>under<br>antiretrovir<br>al<br>medication<br>s | -- | -- | -- | -- | ↓ | -- |
|--------------------------------------------------------------------------------|----|----|----|----|---|----|

Legend of table: <sup>a</sup>Risk of bias: Considered as serious if overall half of the studies included were of serious risk of overall bias. <sup>b</sup>Inconsistency: Considered as serious when  $I^2$  statistics  $\geq 50\%$  (\*) and p-value of  $\chi^2$  test  $< 0.05$  (\*\*). <sup>c</sup>Indirectness: Considered as serious when the applicability of findings were restricted in terms of population, intervention, comparator, and outcomes. <sup>d</sup>Imprecision: Considered as serious when the total number of events was below 300 for dichotomous outcomes or 400 for continuous outcomes (\*), or when the upper and lower limits of 95% CI include both meaningful benefits and harm. <sup>e</sup>Publications bias: Considered as serious if p-value of Begg's funnel plot  $< 0.05$ . Not applicable (N/A) if funnel plot could not be constructed given the limited number of studies. Publication bias was difficult to detect and thus no downgrading was performed. ↓: Downgrade by 1 level in quality of evidence. --: No change in quality of evidence.
